# Supplementary material for: Side chain effect on conjugated polymer/fullerene interfaces in organic solar cells: a DFT study
Source: Royal Society of Chemistry journal article supplement (doi:10.1039/c9cp04511b), 2019-01-01
Supplement: c9cp04511b1.pdf [file c9cp04511b1.pdf]

## Supplementary Information

Side Chain Effect on Conjugated Polymers/Fullerenes Interfaces in Organic Solar Cells – A DFT Study

Sarah A. (Ayoub)<sup>1</sup>, Jolanta B. (Lagowski)<sup>2</sup>

<sup>1</sup> Department of Physics, King Abdulaziz University, Jeddah 21589, Kingdom of Saudi Arabia.

<sup>2</sup> Department of Physics and Physical Oceanography, Memorial University, St. John's, NL, A1B 3X7, Canada.

*[sayoub@kau.edu.sa](mailto:sayoub@kau.edu.sa) , [jolantal@mun.ca](mailto:jolantal@mun.ca)*

Table S1: The results of B97-D3 and B3LYP-D3 binding energies of homogenous and heterogenous pairs with varying the lengths of side chains, and corresponding experimental determined PCEs.

| Monomer        | $n_c$ | monomer/<br>monomer         | Monomer/PCBM                |                               |                   | Monomer/PC <sub>71</sub> BM |                               |                   |
|----------------|-------|-----------------------------|-----------------------------|-------------------------------|-------------------|-----------------------------|-------------------------------|-------------------|
|                |       | $\Delta E_b$ (eV)<br>B97-D3 | $\Delta E_b$ (eV)<br>B97-D3 | $\Delta E_b$ (eV)<br>B3LYP-D3 | PCE (%)           | $\Delta E_b$ (eV)<br>B97-D3 | $\Delta E_b$ (eV)<br>B3LYP-D3 | PCE (%)           |
| P3BT           | 4     | 0.91                        | 1.52                        | 1.47                          | 3.2 <sup>1</sup>  | 1.31                        | 1.23                          |                   |
| P3PT           | 5     | 1.01                        | 1.57                        | 1.52                          | 4.3 <sup>1</sup>  | 1.36                        | 1.28                          |                   |
| P3HT           | 6     | 1.11                        | 1.64                        | 1.58                          | 4.6 <sup>1</sup>  | 1.45                        | 1.37                          |                   |
| P3T            | 8     | 1.31                        | 1.69                        |                               |                   | 1.49                        |                               |                   |
| P3T            | 10    | 1.51                        | 1.70                        |                               |                   | 1.50                        |                               |                   |
| P3T            | 12    | 1.71                        | 1.70                        |                               |                   | 1.51                        |                               |                   |
| P3T            | 14    | 1.90                        | 1.70                        |                               |                   | 1.51                        |                               |                   |
| PCDTBT-C2      | 2     | 1.84                        | 1.93                        | 1.82                          |                   | 1.77                        | 1.67                          |                   |
| PCDTBT-C8      | 8     | 1.99                        | 2.24                        | 2.11                          | 5.2 <sup>2</sup>  | 2.15                        | 1.95                          | 7.5 <sup>2</sup>  |
| PCDTBT-C12     | 12    | 1.99                        | 2.72                        |                               |                   | 2.42                        |                               |                   |
| PBDTPD-2EH/C6  | 6     | 1.38                        | 2.12                        |                               |                   | 1.82                        |                               | 6.6 <sup>3</sup>  |
| PBDTPD-2EH/C7  | 7     | 1.66                        | 2.27                        | 2.36                          |                   | 1.91                        | 1.95                          | 8.5 <sup>3</sup>  |
| PBDTPD-2EH/C8  | 8     | 1.69                        | 2.32                        | 2.39                          |                   | 1.92                        | 1.99                          | 7.5 <sup>3</sup>  |
| PBDTPD-2EH/C12 | 12    | 1.73                        | 2.43                        |                               |                   | 2.09                        |                               |                   |
| PNT4T-C6/C8    | 6/8   | 2.88                        | 2.72                        |                               |                   | 2.45                        |                               |                   |
| PNT4T-2OD      | 8/10  | 2.76                        | 3.01                        | 2.83                          |                   | 2.80                        | 2.57                          | 10.1 <sup>4</sup> |
| PNT4T-2DT      | 10/12 | 1.77                        | 2.54                        | 2.44                          |                   | 2.33                        | 2.14                          |                   |
| PBTff4T-C6/C8  | 6/8   | 1.67                        | 2.17                        |                               |                   | 2.14                        |                               |                   |
| PBTff4T-2OD    | 8/10  | 1.65                        | 2.42                        | 2.33                          | 9.6 <sup>4</sup>  | 2.38                        | 2.22                          | 10.4 <sup>4</sup> |
| PBTff4T-2DT    | 10/12 | 0.65                        | 2.04                        | 1.92                          |                   | 1.97                        | 2.11                          |                   |
| PffBT4T-C6/C8  | 6/8   | 3.09                        | 2.40                        |                               |                   | 2.11                        |                               |                   |
| PffBT4T-2OD    | 8/10  | 2.20                        | 2.54                        | 2.51                          | 10.4 <sup>4</sup> | 2.19                        | 1.89                          | 10.5 <sup>4</sup> |
| PffBT4T-2DT    | 10/12 | 0.88                        | 1.98                        | 2.09                          |                   | 1.73                        | 1.37                          | 7.64 <sup>5</sup> |

Table S2: The results of B97-D3 and B3LYP-D3 binding energies of homogenous and heterogenous pairs with varying the lengths of side chains, and corresponding experimental determined PCEs.

ogenous and heterogenous pairs with varying the number of branched side chains, and corresponding experimental determined PCEs.

| Monomer       | $n_B$ | monomer/<br>monomer         | Monomer/PCBM                |                               |                   | Monomer/PC <sub>71</sub> BM |                               |                      |
|---------------|-------|-----------------------------|-----------------------------|-------------------------------|-------------------|-----------------------------|-------------------------------|----------------------|
|               |       | $\Delta E_b$ (eV)<br>B97-D3 | $\Delta E_b$ (eV)<br>B97-D3 | $\Delta E_b$ (eV)<br>B3LYP-D3 | PCE (%)           | $\Delta E_b$ (eV)<br>B97-D3 | $\Delta E_b$ (eV)<br>B3LYP-D3 | PCE (%)              |
| P3HT          | 0     | 1.11                        | 1.64                        | 1.58                          | 3.48 <sup>6</sup> | 1.45                        | 1.37                          |                      |
| P3HT-co-EHT   | 1     | 0.99                        | 1.69                        | 1.68                          | 3.85 <sup>6</sup> | 1.39                        | 1.47                          |                      |
| P3EHT         | 2     | 0.93                        | 1.28                        | 1.13                          | 0.83 <sup>6</sup> | 1.13                        | 1.13                          |                      |
| PBDTPD-C12/C8 | 0     | 2.49                        | 2.53                        | 2.83                          |                   | 2.17                        | 2.61                          | 3.2 <sup>3</sup>     |
| PBDTPD-2EH/C8 | 1     | 1.69                        | 2.32                        | 2.39                          |                   | 1.99                        | 1.99                          | 6-7.5 <sup>3,7</sup> |
| PBDTPD-2EH/EH | 2     | 1.36                        | 2.12                        |                               |                   | 1.75                        |                               | 3.2                  |
| PTB1          | 0     | 3.07                        | 2.74                        |                               | 4.8 <sup>8</sup>  | 2.40                        |                               | 5.6 <sup>8</sup>     |
| PTB4          | 1     | 2.10                        | 2.37                        | 2.25                          | 6.1 <sup>8</sup>  | 2.20                        | 1.99                          | 7.1 <sup>8</sup>     |
| PTB7          | 2     | 1.77                        | 2.22                        | 2.30                          |                   | 2.01                        | 2.11                          | 7.4                  |

Table S3: The results of B97-D3 and B3LYP-D3 binding energies of homogenous and heterogenous pairs with varying the branching positions of branched side chains, and the corresponding experimental determined PCEs.

| Monomer/Monomer | $P_B$ | monomer/<br>monomer         | Monomer/PCBM                |                               |                         | Monomer/PC <sub>71</sub> BM |                               |                         |
|-----------------|-------|-----------------------------|-----------------------------|-------------------------------|-------------------------|-----------------------------|-------------------------------|-------------------------|
|                 |       | $\Delta E_b$ (eV)<br>B97-D3 | $\Delta E_b$ (eV)<br>B97-D3 | $\Delta E_b$ (eV)<br>B3LYP-D3 | PCE (%)<br><sup>4</sup> | $\Delta E_b$ (eV)<br>B97-D3 | $\Delta E_b$ (eV)<br>B3LYP-D3 | PCE (%)<br><sup>4</sup> |
| PNT4T-1ON       | 1     | 3.22                        | 2.70                        | 2.56                          |                         | 2.57                        | 2.30                          |                         |
| PNT4T-2OD       | 2     | 2.76                        | 3.01                        | 2.83                          |                         | 2.80                        | 2.57                          | 10.1                    |
| PNT4T-3OT       | 3     | 3.22                        | 2.43                        | 2.27                          |                         | 2.83                        | 2.23                          |                         |
| PBTff4T-1ON     | 1     | 1.50                        | 2.38                        | 2.49                          |                         | 2.09                        | 1.91                          |                         |
| PBTff4T-2OD     | 2     | 1.65                        | 2.42                        | 2.33                          | 9.6                     | 2.38                        | 2.22                          | 10.4                    |
| PBTff4T-3OT     | 3     | 2.36                        | 1.94                        | 2.18                          |                         | 2.28                        | 2.11                          |                         |
| PffBT4T-1ON     | 1     | 2.81                        | 2.05                        | 1.88                          |                         | 1.76                        | 1.92                          |                         |
| PffBT4T-2OD     | 2     | 2.20                        | 2.54                        | 2.51                          | 10.4                    | 2.19                        | 2.09                          | 10.5                    |
| PffBT4T-3OT     | 3     | 2.92                        | 2.21                        | 2.76                          |                         |                             | 2.56                          |                         |

Table S4: The electronic offsets of isolated monomers and fullerenes calculated at the B3LYP method.

| Isolated Monomers | Electronic Offsets from PCBM |                         |                                 |                                                        | Electronic Offsets from PC <sub>71</sub> BM |                         |                                 |                                                        |
|-------------------|------------------------------|-------------------------|---------------------------------|--------------------------------------------------------|---------------------------------------------|-------------------------|---------------------------------|--------------------------------------------------------|
|                   | $\Delta\epsilon_{HOMO}$      | $\Delta\epsilon_{LUMO}$ | $\Delta\epsilon_{H_D-L_A} - 0.$ | $\frac{\Delta\epsilon_{H_D-L_A} - 0.}{E_{g(monomer)}}$ | $\Delta\epsilon_{HOMO}$                     | $\Delta\epsilon_{LUMO}$ | $\Delta\epsilon_{H_D-L_A} - 0.$ | $\frac{\Delta\epsilon_{H_D-L_A} - 0.}{E_{g(monomer)}}$ |
| P3BT              | 0.22                         | 1.98                    | 2.03                            | 0.47                                                   | 0.22                                        | 2.00                    | 2.01                            | 0.47                                                   |
| P3PT              | 0.23                         | 1.98                    | 2.02                            | 0.47                                                   | 0.23                                        | 2.00                    | 2.00                            | 0.47                                                   |
| P3HT              | 0.22                         | 1.99                    | 2.03                            | 0.47                                                   | 0.22                                        | 2.01                    | 2.01                            | 0.47                                                   |
| P3HT-co-EHT       | 0.23                         | 1.96                    | 2.02                            | 0.47                                                   | 0.23                                        | 1.98                    | 2.00                            | 0.47                                                   |
| P3EHT             | 0.27                         | 1.91                    | 1.98                            | 0.47                                                   | 0.27                                        | 1.93                    | 1.96                            | 0.47                                                   |
| PCDTBT-C2         | 0.59                         | 0.47                    | 1.66                            | 0.68                                                   | 0.59                                        | 0.49                    | 1.64                            | 0.68                                                   |
| PCDTBT-C8         | 0.60                         | 0.47                    | 1.65                            | 0.68                                                   | 0.60                                        | 0.49                    | 1.63                            | 0.67                                                   |
| PBDTPD-2EH/C7     | 0.40                         | 0.86                    | 1.85                            | 0.61                                                   | 0.40                                        | 0.88                    | 1.83                            | 0.61                                                   |
| PBDTPD-2EH/C8     | 0.43                         | 0.87                    | 1.82                            | 0.61                                                   | 0.43                                        | 0.89                    | 1.80                            | 0.60                                                   |
| PBDTPD-C12/C8     | 0.28                         | 0.82                    | 1.97                            | 0.64                                                   | 0.28                                        | 0.84                    | 1.95                            | 0.63                                                   |
| PTB4              | 0.43                         | 1.01                    | 1.82                            | 0.58                                                   | 0.43                                        | 1.03                    | 1.80                            | 0.58                                                   |
| PTB7              | 0.42                         | 0.97                    | 1.83                            | 0.59                                                   | 0.42                                        | 0.99                    | 1.81                            | 0.58                                                   |
| PNT4T-1ON         | 0.46                         | 0.15                    | 1.79                            | 0.80                                                   | 0.46                                        | 0.17                    | 1.77                            | 0.79                                                   |
| PNT4T-2OD         | 0.53                         | 0.12                    | 1.72                            | 0.80                                                   | 0.53                                        | 0.14                    | 1.70                            | 0.79                                                   |
| PNT4T-3OT         | 0.60                         | 0.14                    | 1.65                            | 0.79                                                   | 0.60                                        | 0.16                    | 1.63                            | 0.78                                                   |
| PNT4T-2DT         | 0.59                         | 0.12                    | 1.66                            | 0.80                                                   | 0.59                                        | 0.14                    | 1.64                            | 0.79                                                   |
| PBTff4T-1ON       | 0.52                         | 0.39                    | 1.73                            | 0.72                                                   | 0.52                                        | 0.41                    | 1.71                            | 0.71                                                   |
| PBTff4T-2OD       | 0.58                         | 0.35                    | 1.67                            | 0.72                                                   | 0.58                                        | 0.37                    | 1.65                            | 0.71                                                   |
| PBTff4T-3OT       | 0.59                         | 0.39                    | 1.66                            | 0.71                                                   | 0.59                                        | 0.41                    | 1.64                            | 0.70                                                   |
| PBTff4T-2DT       | 0.50                         | 0.35                    | 1.75                            | 0.73                                                   | 0.50                                        | 0.37                    | 1.73                            | 0.72                                                   |
| Pff4TBT-1ON       | 0.50                         | 0.33                    | 1.75                            | 0.73                                                   | 0.50                                        | 0.35                    | 1.73                            | 0.73                                                   |
| Pff4TBT-2OD       | 0.54                         | 0.32                    | 1.71                            | 0.73                                                   | 0.54                                        | 0.34                    | 1.69                            | 0.73                                                   |

|             |      |      |      |      |      |      |      |      |
|-------------|------|------|------|------|------|------|------|------|
| Pff4TBT-3OT | 0.63 | 0.32 | 1.62 | 0.72 | 0.63 | 0.34 | 1.60 | 0.71 |
| Pff4TBT-2DT | 0.51 | 0.30 | 1.74 | 0.74 | 0.51 | 0.32 | 1.72 | 0.74 |

Table S5: The electronic offsets of the interacting monomers and fullerenes calculated at the SP B3LYP method using the B97-D3 optimized geometries.

| Interacting Monomers | Electronic Offsets from PCBM |                         |                                 |                                                        | Electronic Offsets from PC <sub>71</sub> BM |                         |                                 |                                                        |
|----------------------|------------------------------|-------------------------|---------------------------------|--------------------------------------------------------|---------------------------------------------|-------------------------|---------------------------------|--------------------------------------------------------|
|                      | $\Delta\epsilon_{HOMO}$      | $\Delta\epsilon_{LUMO}$ | $\Delta\epsilon_{H_D-L_A} - 0.$ | $\frac{\Delta\epsilon_{H_D-L_A} - 0.}{E_{g(monomer)}}$ | $\Delta\epsilon_{HOMO}$                     | $\Delta\epsilon_{LUMO}$ | $\Delta\epsilon_{H_D-L_A} - 0.$ | $\frac{\Delta\epsilon_{H_D-L_A} - 0.}{E_{g(monomer)}}$ |
| P3BT                 | 0.43                         | 2.00                    | 1.80                            | 2.03                                                   | 0.36                                        | 1.99                    | 1.81                            | 2.03                                                   |
| P3PT                 | 0.44                         | 2.00                    | 1.79                            | 2.02                                                   | 0.37                                        | 2.00                    | 1.81                            | 2.03                                                   |
| P3HT                 | 0.44                         | 2.01                    | 1.79                            | 2.02                                                   | 0.36                                        | 2.00                    | 1.81                            | 2.03                                                   |
| P3HT-co-EHT          | 0.38                         | 2.02                    | 1.85                            | 2.08                                                   | 0.38                                        | 1.98                    | 1.79                            | 2.02                                                   |
| P3EHT                | 0.38                         | 2.00                    | 1.85                            | 2.08                                                   | 0.23                                        | 2.14                    | 1.94                            | 2.17                                                   |
| PCDTBT-C2            | 0.68                         | 0.56                    | 1.55                            | 1.73                                                   | 0.58                                        | 0.53                    | 1.59                            | 1.76                                                   |
| PCDTBT-C8            | 0.64                         | 0.51                    | 1.60                            | 1.77                                                   | 0.59                                        | 0.53                    | 1.59                            | 1.76                                                   |
| PBDTPD-2EH/C7        | 0.47                         | 1.00                    | 1.76                            | 0.58                                                   | 0.45                                        | 0.99                    | 1.72                            | 0.57                                                   |
| PBDTPD-2EH/C8        | 0.45                         | 1.01                    | 1.78                            | 0.58                                                   | 0.46                                        | 0.99                    | 1.71                            | 0.57                                                   |
| PBDTPD-C12/C8        | 0.42                         | 0.96                    | 1.81                            | 0.59                                                   | 0.38                                        | 0.95                    | 1.80                            | 0.59                                                   |
| PTB4                 | 0.61                         | 0.98                    | 1.62                            | 0.56                                                   | 0.52                                        | 0.97                    | 1.65                            | 0.56                                                   |
| PTB7                 | 0.61                         | 0.97                    | 1.62                            | 0.56                                                   | 0.52                                        | 0.95                    | 1.66                            | 0.57                                                   |
| PNT4T-1ON            | 0.55                         | 0.19                    | 1.69                            | 0.78                                                   | 0.45                                        | 0.18                    | 1.73                            | 0.78                                                   |
| PNT4T-2OD            | 0.75                         | 0.19                    | 1.49                            | 0.75                                                   | 0.71                                        | 0.18                    | 1.47                            | 0.76                                                   |
| PNT4T-3OT            | 0.70                         | 0.22                    | 1.54                            | 0.75                                                   | 0.43                                        | 0.18                    | 1.75                            | 0.78                                                   |
| PNT4T-2DT            | 0.75                         | 0.19                    | 1.49                            | 0.75                                                   | 0.71                                        | 0.18                    | 1.47                            | 0.76                                                   |
| PBTff4T-1ON          | 0.69                         | 0.31                    | 1.54                            | 0.72                                                   | 0.43                                        | 0.38                    | 1.74                            | 0.72                                                   |
| PBTff4T-2OD          | 0.60                         | 0.41                    | 1.64                            | 0.70                                                   | 0.50                                        | 0.37                    | 1.67                            | 0.71                                                   |
| PBTff4T-3OT          | 0.64                         | 0.46                    | 1.60                            | 0.68                                                   | 0.54                                        | 0.42                    | 1.63                            | 0.69                                                   |
| PBTff4T-2DT          | 0.59                         | 0.40                    | 1.65                            | 0.70                                                   | 0.50                                        | 0.36                    | 1.68                            | 0.72                                                   |
| Pff4TBT-1ON          | 0.61                         | 0.41                    | 1.63                            | 0.70                                                   | 0.48                                        | 0.35                    | 1.70                            | 0.72                                                   |
| Pff4TBT-2OD          | 0.65                         | 0.44                    | 1.59                            | 0.68                                                   | 0.40                                        | 0.32                    | 1.77                            | 0.74                                                   |

|             |      |      |      |      |      |      |      |      |
|-------------|------|------|------|------|------|------|------|------|
| Pff4TBT-3OT | 0.67 | 0.35 | 1.56 | 0.71 | 0.51 | 0.32 | 1.66 | 0.73 |
| Pff4TBT-2DT | 0.59 | 0.30 | 1.64 | 0.73 | 0.47 | 0.29 | 1.69 | 0.74 |

Table S6: The electronic offsets of the interacting monomers and fullerenes calculated at the SP B3LYP method using the B3LYP-D3 optimized geometries.

| Interacting Monomers | Electronic Offsets from PCBM |                         |                                 |                                                        | Electronic Offsets from PC <sub>71</sub> BM |                         |                                 |                                                        |
|----------------------|------------------------------|-------------------------|---------------------------------|--------------------------------------------------------|---------------------------------------------|-------------------------|---------------------------------|--------------------------------------------------------|
|                      | $\Delta\epsilon_{HOMO}$      | $\Delta\epsilon_{LUMO}$ | $\Delta\epsilon_{H_D-L_A} - 0.$ | $\frac{\Delta\epsilon_{H_D-L_A} - 0.}{E_{g(monomer)}}$ | $\Delta\epsilon_{HOMO}$                     | $\Delta\epsilon_{LUMO}$ | $\Delta\epsilon_{H_D-L_A} - 0.$ | $\frac{\Delta\epsilon_{H_D-L_A} - 0.}{E_{g(monomer)}}$ |
| P3BT                 | 0.38                         | 2.02                    | 1.89                            | 0.45                                                   | 0.32                                        | 2.00                    | 1.91                            | 0.45                                                   |
| P3PT                 | 0.39                         | 2.02                    | 1.89                            | 0.45                                                   | 0.33                                        | 2.00                    | 1.91                            | 0.45                                                   |
| P3HT                 | 0.39                         | 2.02                    | 1.88                            | 0.45                                                   | 0.33                                        | 2.00                    | 1.91                            | 0.45                                                   |
| P3HT-co-EHT          | 0.27                         | 2.09                    | 2.00                            | 0.46                                                   | 0.34                                        | 1.98                    | 1.89                            | 0.45                                                   |
| P3EHT                | 0.35                         | 2.00                    | 1.92                            | 0.45                                                   | 0.19                                        | 2.15                    | 2.05                            | 0.45                                                   |
| PCDTBT-C2            | 0.62                         | 0.59                    | 1.65                            | 0.65                                                   | 0.53                                        | 0.54                    | 1.70                            | 0.67                                                   |
| PCDTBT-C8            | 0.59                         | 0.61                    | 1.68                            | 0.65                                                   | 0.53                                        | 0.56                    | 1.71                            | 0.67                                                   |
| PBDTPD-2EH/C7        | 0.42                         | 1.08                    | 1.85                            | 0.57                                                   | 0.43                                        | 0.99                    | 1.80                            | 0.58                                                   |
| PBDTPD-2EH/C8        | 0.43                         | 1.07                    | 1.84                            | 0.57                                                   | 0.44                                        | 1.01                    | 1.79                            | 0.58                                                   |
| PBDTPD-C12/C8        | 0.42                         | 1.00                    | 1.85                            | 0.59                                                   | 0.38                                        | 0.98                    | 1.86                            | 0.59                                                   |
| PTB4                 | 0.55                         | 1.01                    | 1.72                            | 0.57                                                   | 0.51                                        | 0.99                    | 1.73                            | 0.57                                                   |
| PTB7                 | 0.56                         | 1.00                    | 1.71                            | 0.57                                                   | 0.49                                        | 0.97                    | 1.75                            | 0.58                                                   |
| PNT4T-1ON            | 0.34                         | 0.18                    | 1.93                            | 0.80                                                   | 0.41                                        | 0.22                    | 1.83                            | 0.78                                                   |
| PNT4T-2OD            | 0.61                         | 0.23                    | 1.66                            | 0.76                                                   | 0.64                                        | 0.19                    | 1.60                            | 0.77                                                   |
| PNT4T-3OT            | 0.56                         | 0.26                    | 1.72                            | 0.76                                                   | 0.55                                        | 0.26                    | 1.69                            | 0.75                                                   |
| PNT4T-2DT            | 0.61                         | 0.22                    | 1.66                            | 0.76                                                   | 0.63                                        | 0.19                    | 1.61                            | 0.77                                                   |
| PBTff4T-1ON          | 0.61                         | 0.35                    | 1.66                            | 0.72                                                   | 0.20                                        | 0.42                    | 2.04                            | 0.74                                                   |
| PBTff4T-2OD          | 0.54                         | 0.44                    | 1.74                            | 0.70                                                   | 0.46                                        | 0.36                    | 1.77                            | 0.73                                                   |
| PBTff4T-3OT          | 0.60                         | 0.54                    | 1.67                            | 0.67                                                   | 0.50                                        | 0.44                    | 1.74                            | 0.68                                                   |
| PBTff4T-2DT          | 0.51                         | 0.45                    | 1.76                            | 0.70                                                   | 0.46                                        | 0.35                    | 1.78                            | 0.73                                                   |

|             |      |      |      |      |      |      |      |      |
|-------------|------|------|------|------|------|------|------|------|
| Pff4TBT-1ON | 0.49 | 0.43 | 1.79 | 0.71 | 0.41 | 0.33 | 1.82 | 0.74 |
| Pff4TBT-2OD | 0.38 | 0.46 | 1.89 | 0.71 | 0.32 | 0.37 | 1.92 | 0.74 |
| Pff4TBT-3OT | 0.33 | 0.45 | 1.93 | 0.72 | 0.41 | 0.37 | 1.82 | 0.73 |
| Pff4TBT-2DT | 0.34 | 0.47 | 1.93 | 0.72 | 0.30 | 0.37 | 1.93 | 0.74 |

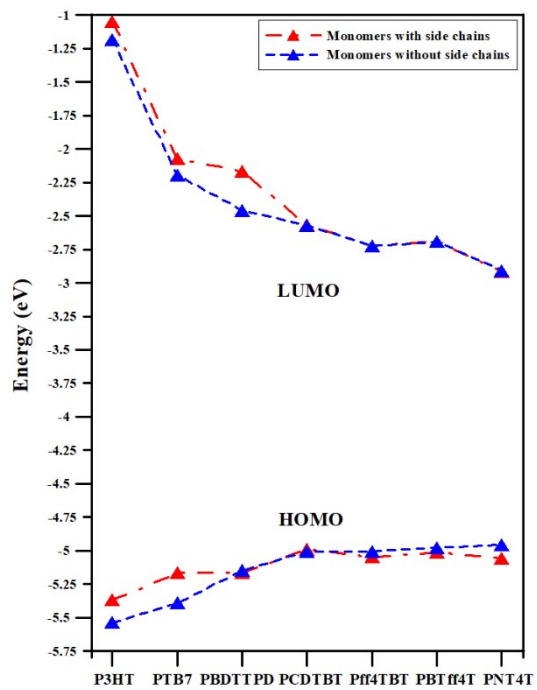

Figure S1: Energy levels of gas phase monomers with and without side chains calculated at the B3LYP method.



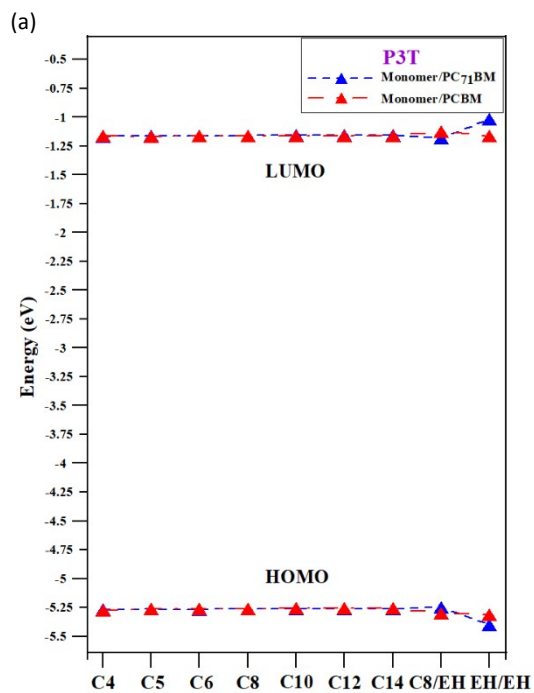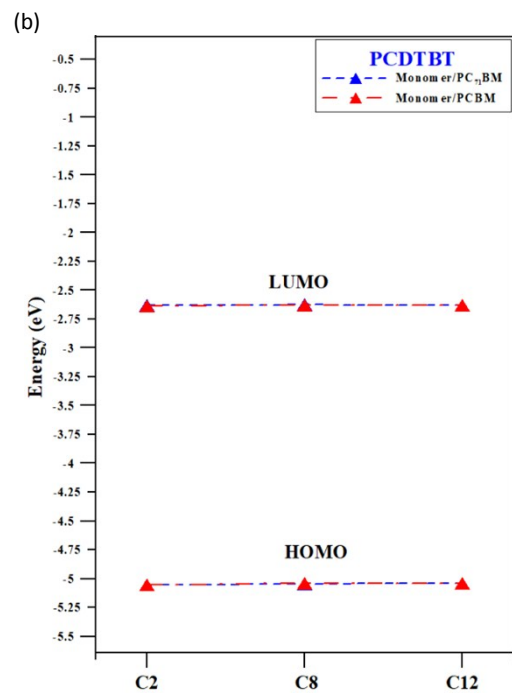

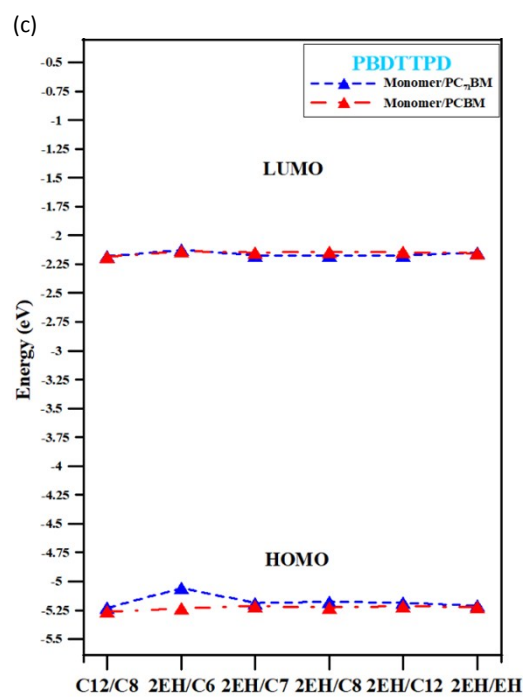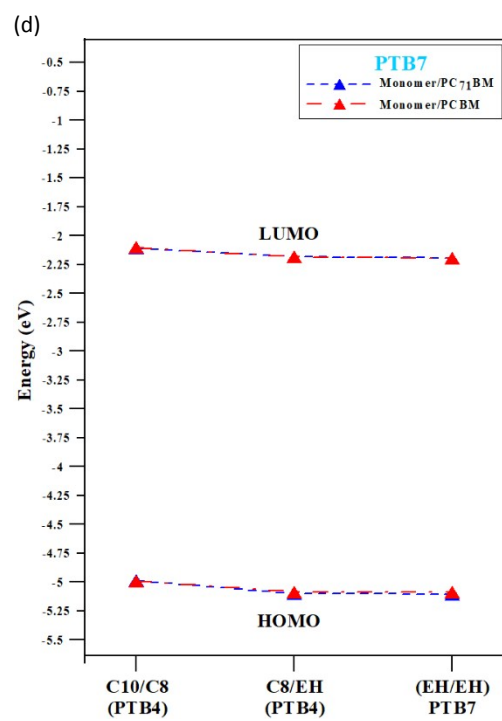

(e)

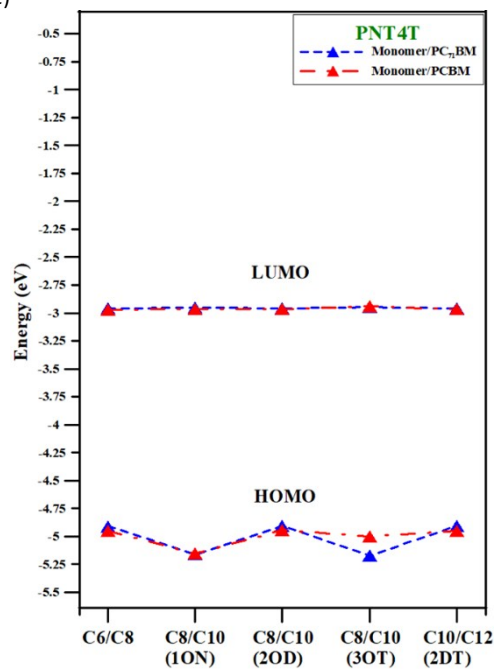

(f)

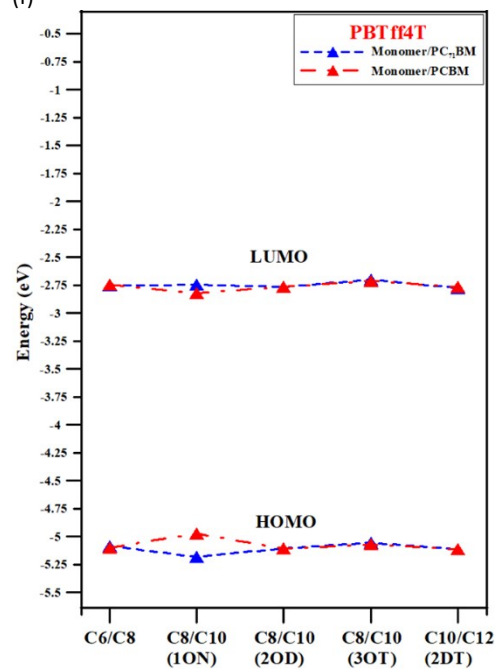

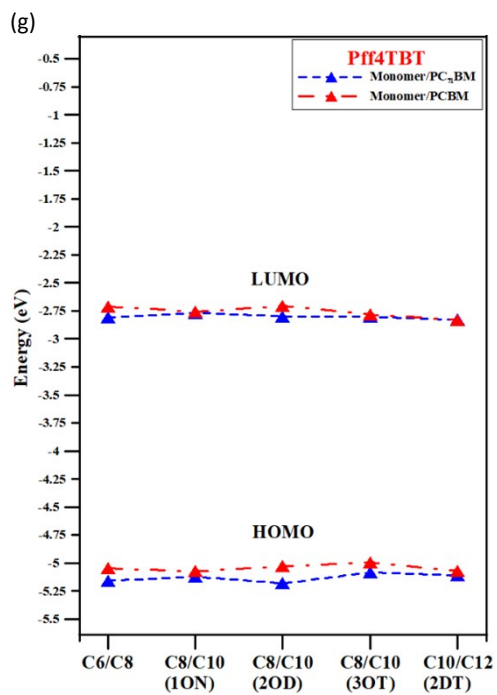

Figure S2: The energy levels of interacting (a) P3T, (b) PCDTBT, (c) PBDTTPD, (d) PTB7, (e) PNT4T, (f) PBTff4T, and (g) Pff4TBT with various side chains, and with two types of fullerenes, calculated at the SP B3LYP using the B97-D3 optimized geometries.

## References

1. A. Gadisa, W. D. Oosterbaan, K. Vandewal, J. C. Bolsee, S. Bertho, J. D'Haen, L. Lutsen, D. Vanderzande and J. V. Manca, *Advanced Functional Materials*, 2009, **19**, 3300-3306.
2. S. Beaupre and M. Leclerc, *Journal of Materials Chemistry A*, 2013, **1**, 11097-11105.
3. C. Cabanetos, A. El Labban, J. A. Bartelt, J. D. Douglas, W. R. Mateker, J. M. J. Frechet, M. D. McGehee and P. M. Beaujuge, *Journal of the American Chemical Society*, 2013, **135**, 4656-4659.
4. Y. H. Liu, J. B. Zhao, Z. K. Li, C. Mu, W. Ma, H. W. Hu, K. Jiang, H. R. Lin, H. Ade and H. Yan, *Nature Communications*, 2014, **5**, 5293.
5. Z. H. Chen, P. Cai, J. W. Chen, X. C. Liu, L. J. Zhang, L. F. Lan, J. B. Peng, Y. G. Ma and Y. Cao, *Advanced Materials*, 2014, **26**, 2586-2591.
6. B. Burkhart, P. P. Khlyabich and B. C. Thompson, *Macromolecules*, 2012, **45**, 3740-3748.
7. K. R. Graham, C. Cabanetos, J. P. Jahnke, M. N. Idso, A. El Labban, G. O. N. Ndjawa, T. Heumueller, K. Vandewal, A. Salleo, B. F. Chmelka, A. Amassian, P. M. Beaujuge and M. D. McGehee, *Journal of the American Chemical Society*, 2014, **136**, 9608-9618.
8. J. M. Szarko, J. C. Guo, Y. Y. Liang, B. Lee, B. S. Rolczynski, J. Strzalka, T. Xu, S. Loser, T. J. Marks, L. P. Yu and L. X. Chen, *Advanced Materials*, 2010, **22**, 5468-5472.
